# Supplementary material for: Genetic features of Mycobacterium tuberculosis modern Beijing sublineage
Source: PubMed Central journal article supplement (PMC4777927; doi:10.1038/emi.2016.14), 2016-02-24

**Supplementary Figure S1** The other three SNPs that didn't change expression of downstream genes. Modern Beijing SNPs in the predicted promoters of *tcrA*, *Rv0238* and *phhB* didn't change the down stream genes expressions.

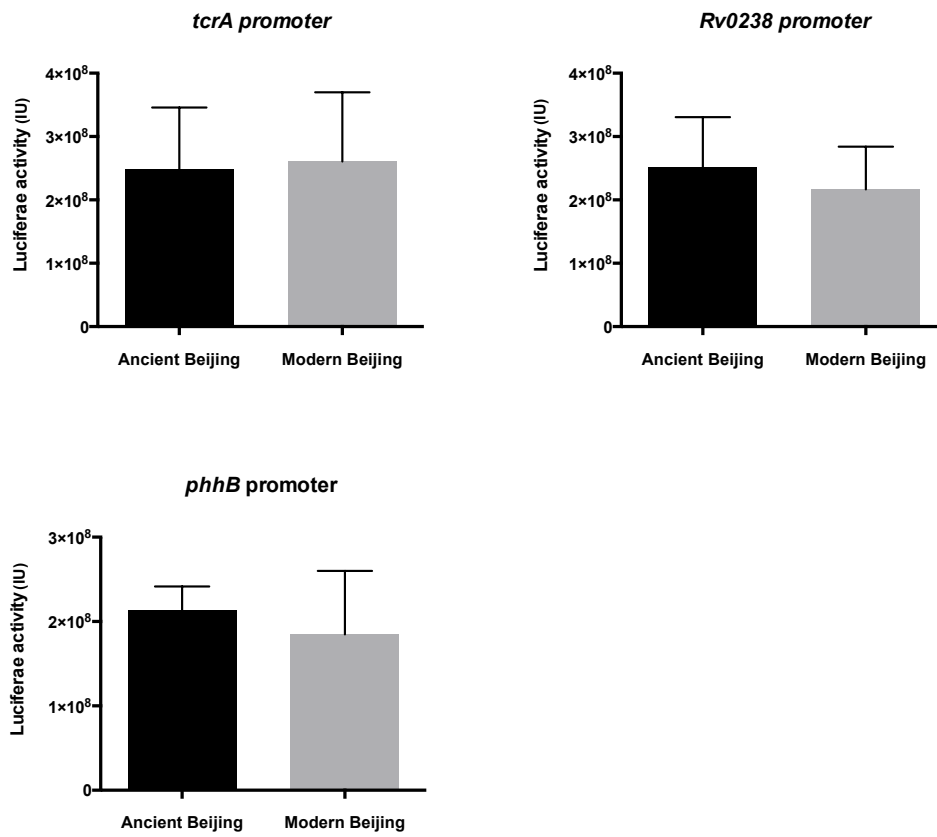

Supplement: emi201614x5.pdf [file emi201614x5.pdf]
